# Supplementary material for: Supercritical Fluid Microcellular Foaming of High-Hardness TPU via a Pressure-Quenching Process: Restricted Foam Expansion Controlled by Matrix Modulus and Thermal Degradation
Source: MDPI journal article supplement (doi:10.3390/molecules27248911), 2022-12-15
Supplement: s1 [file s1]

# **Supercritical Fluid Microcellular Foaming of High-Hardness TPU via a Pressure-Quenching Process: Restricted foam Expansion Controlled by Matrix Modulus and Thermal Degradation**

**Bichi Chen<sup>1,†</sup>, Junjie Jiang<sup>1,2,3,†</sup>, Yaozong Li<sup>1</sup>, Mengnan Zhou<sup>1</sup>, Zelin Wang<sup>1</sup>, Liang Wang<sup>1</sup> and Wentao Zhai<sup>1,\*</sup>**

<sup>1</sup> School of Materials Science and Engineering, Sun Yat-sen University, Guangzhou 510275, China

<sup>2</sup> Ningbo Key Lab of Polymer Materials, Ningbo Institute of Materials Technology and Engineering, Chinese Academy of Sciences, Ningbo 315201, China

<sup>3</sup> University of Chinese Academy of Sciences, Beijing 100049, China

\* Correspondence: zhaiwt3@mail.sysu.edu.cn; Tel./Fax: +86-020-8411-3428

† These authors contributed equally to this work.

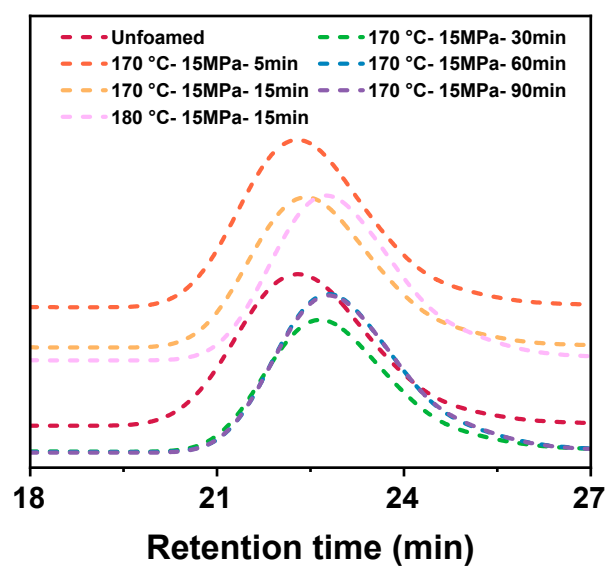

**Figure S1.** Retention time curves of foams and unfoamed sample. The saturation pressure were 15 MPa, and the saturation temperature was 170 °C or 180 °C with varying saturation time.

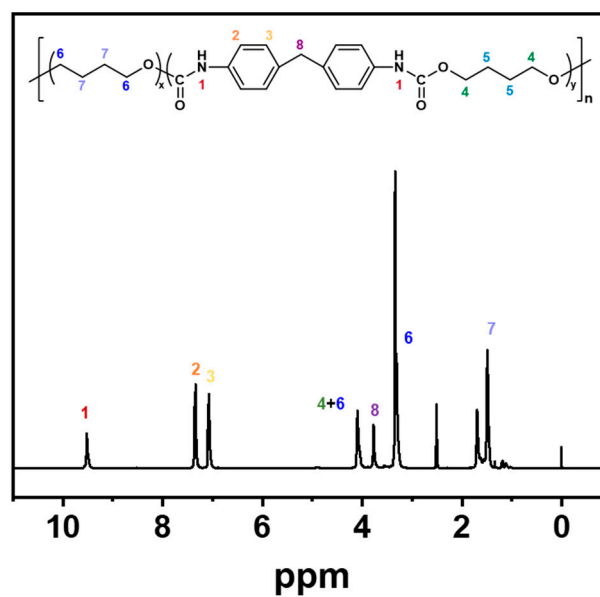

**Figure S2.**  $^1\text{H}$  NMR spectra of 75D raw material.
